# Supplementary figures and images for: Aerial course stabilization is impaired in motion-blind flies
Source: Oxford University Press journal article supplement (doi:10.1242/jeb.242219), 2021-07-01

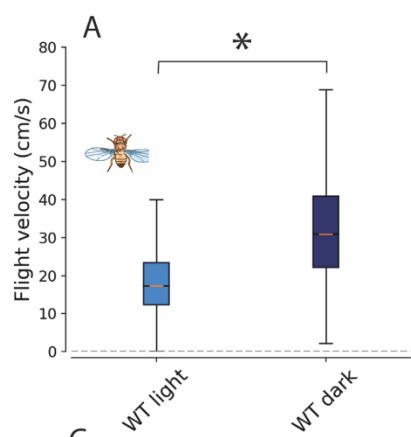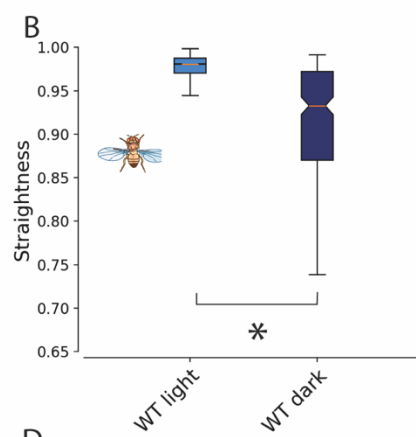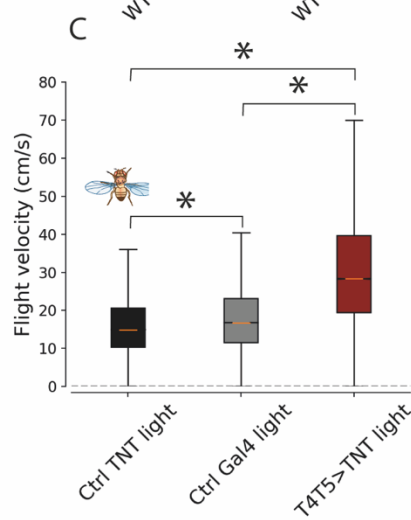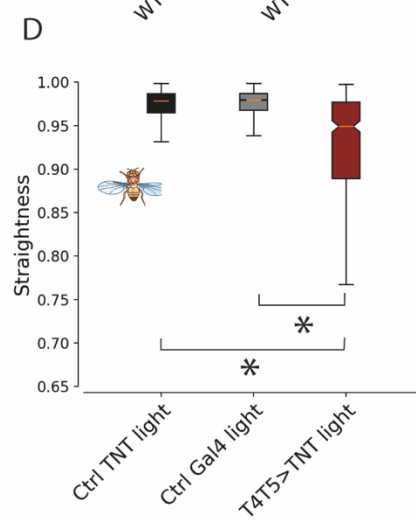

Supplement: jeb242219supp.pdf [file jeb242219supp.pdf]
